# Supplementary material
Source: PubMed Central journal article supplement (PMC3747632)
Supplement: NIHMS143790-supplement-1.pdf [file NIHMS143790-supplement-1.pdf]

## Supplemental Information

**Table S1.** Sample Personal Threat Scene Exemplars by Control and PTSD Exposure Subtypes

| Category/Individual Scripts                                                                                                                                                                                                                                                                                                                                                                                                                                                                                                                             |
|---------------------------------------------------------------------------------------------------------------------------------------------------------------------------------------------------------------------------------------------------------------------------------------------------------------------------------------------------------------------------------------------------------------------------------------------------------------------------------------------------------------------------------------------------------|
| <i>Non-exposed Control</i>                                                                                                                                                                                                                                                                                                                                                                                                                                                                                                                              |
| <ol style="list-style-type: none"> <li>1. My heart pounds as the bus runs the stop sign. I scream from the back seat but it's too late.</li> <li>2. In the middle of the night, I awake to the fire alarm. I feel sweaty as my roommate and I escape the burning house.</li> <li>3. I clench my jaw and fist as the nurse prepares the needle. I quickly close my eyes to avoid seeing the injection.</li> <li>4. I feel tense all over as I climb the shaky ladder. I lose my grip and try to grab the roof but it's too late, I'm falling.</li> </ol> |
| <i>Trauma-exposed Control</i>                                                                                                                                                                                                                                                                                                                                                                                                                                                                                                                           |
| <ol style="list-style-type: none"> <li>1. My car goes off the road into a body of water. I can't get out, I can't breathe, and my heart is pounding.</li> <li>2. As the man rips open my blouse, I shriek. I know he is going to rape and kill me. My whole body is numb.</li> <li>3. My heart beats fast as the prison riot breaks out. People stab each other right in front of me.</li> <li>4. My heart stops and my whole body shakes as I realize, out of anger, my boyfriend is holding a gun to my head.</li> </ol>                              |
| <i>Single-trauma PTSD</i>                                                                                                                                                                                                                                                                                                                                                                                                                                                                                                                               |
| <ol style="list-style-type: none"> <li>1. My leg is trapped between the seats. This is it, the van is full of smoke and I am going to die in this fire.</li> <li>2. The hair on my arms stands up as the guy orders me to the ground. Another points a gun at my face.</li> <li>3. The strange man grabs me and beats me with his gun. My heart is racing and I want to scream. I hope I don't die.</li> <li>4. My heart races while intimate with my boyfriend. I tense up as his face suddenly changes into one of the rapists.</li> </ol>            |
| <i>Multiple-trauma PTSD</i>                                                                                                                                                                                                                                                                                                                                                                                                                                                                                                                             |
| <ol style="list-style-type: none"> <li>1. With my heart racing, I gasp for air as my stepfather pins me down on my mother's bed. I'm crying, kicking, and biting.</li> <li>2. My heart pounds and my body shakes as I smell my hair burning. I jump out of the way just as his shotgun fires.</li> <li>3. My stomach cramps up and I feel lightheaded as I'm pushed against the wall. He hits me and rips at my clothes.</li> <li>4. My heart pounds when I see the delivery truck in front of me. I slam on the brake and start to scream.</li> </ol>  |

**Table S2.** Pre-script Onset Baseline Physiological Values (Means and Standard Deviations) by Control and PTSD Groups

| Response Modality                        | Control       | PTSD          | Group Effect                  |
|------------------------------------------|---------------|---------------|-------------------------------|
| Heart Rate (bpm)                         | 65.11 (10.09) | 75.47 (12.70) | $F(1, 122) = 25.24, p < .001$ |
| ITI Startle Reflex Magnitude ( $\mu V$ ) | 2.86 (4.87)   | 2.31 (3.32)   | $F(1, 123) = 0.49, ns$        |
| SCL ( $\mu S$ )                          | 2.05 (3.83)   | 2.27 (3.54)   | $F(1, 120) = 0.10, ns$        |
| Corrugator EMG ( $\mu V$ )               | 4.38 (2.90)   | 4.92 (3.80)   | $F(1, 123) = 0.79, ns$        |
| Orbicularis EMG ( $\mu V$ )              | 3.09 (3.24)   | 3.88 (4.41)   | $F(1, 123) = 0.40, ns$        |

bpm, beats per minute; ITI, intertrial interval; SCL, skin conductance level; ns, not significant.
